# Supplementary material for: Combining Donor-derived Cell-free DNA Fraction and Quantity to Detect Kidney Transplant Rejection Using Molecular Diagnoses and Histology as Confirmation
Source: PubMed Central journal article supplement — Transplantation. 2022 Nov 22;106(12):2435–42. doi: 10.1097/TP.0000000000004212 (PMC9698190; doi:10.1097/tp.0000000000004212), 2022-11-22
Supplement: tp-106-2435-s001.pdf [file tp-106-2435-s001.pdf]

# Supplemental Digital Content

## Table of Contents

|                                                                                                                                                                                 |   |
|---------------------------------------------------------------------------------------------------------------------------------------------------------------------------------|---|
| Table S1: Performance of the dd-cfDNA fraction and quantity as determined by both MMDx and histology across total, training, and test sets .....                                | 3 |
| Table S2: Positive and negative predictive values for the two-threshold algorithm projected to different cohort AR prevalences, using molecular pathology as a comparator. .... | 4 |
| Table S3: Published prospective studies assessing the performance of dd-cfDNA to detect rejection in renal allograft patients. ....                                             | 5 |
| Figure S1 .....                                                                                                                                                                 | 6 |
| Figure S2: Plot of dd-cfDNA fraction (%) and quantity (cp/mL) based on MMDx for the training set (A, N=149) and test set (B, N= 218). ....                                      | 7 |
| Figure S3: Plot of dd-cfDNA fraction (%) and quantity (cp/mL) based on histology (Banff criteria) for the training set (A, N=146) and test set (B, N=213). ....                 | 8 |

**Table S1: Performance of the dd-cfDNA fraction and quantity as determined by both MMDx and histology across total, training, and test sets.**

| Diagnostic modality        | Sample set                  | Two-Threshold Algorithm |                         |                 |                 |                      | Logistic Regression |
|----------------------------|-----------------------------|-------------------------|-------------------------|-----------------|-----------------|----------------------|---------------------|
|                            |                             | Sensitivity<br>(%; X/X) | Specificity<br>(%; X/X) | PPV<br>(%, X/X) | NPV<br>(%, X/X) | Accuracy<br>(%, X/X) | AUC                 |
| <b>MMDx</b>                | <b>Total<br/>(N=367)</b>    | 82.4<br>103/125         | 79.7<br>193/242         | 67.8<br>103/152 | 89.8<br>193/215 | 80.1<br>294/367      | 0.86*               |
|                            | <b>Training<br/>(N=149)</b> | 81.5<br>44/54           | 77.9<br>74/95           | 67.8<br>44/65   | 88.1<br>74/84   | 79.19<br>118/149     | 0.84*               |
|                            | <b>Test<br/>(N=218)</b>     | 83.1<br>59/71           | 81.0<br>119/147         | 67.8<br>59/87   | 90.8<br>119/131 | 81.65<br>178/218     | 0.88                |
| <b>Banff<br/>Histology</b> | <b>Total<br/>(N=359)</b>    | 73.2<br>104/142         | 79.3<br>172/217         | 69.8<br>104/149 | 81.9<br>172/210 | 76.9<br>312/359      | 0.82*               |
|                            | <b>Training<br/>(N=146)</b> | 72.9<br>43/59           | 77.0<br>67/87           | 68.3<br>43/63   | 80.7<br>67/83   | 75.3<br>110/146      | 0.82*               |
|                            | <b>Test<br/>(N=213)</b>     | 73.5<br>61/83           | 80.8<br>105/130         | 70.9<br>61/86   | 82.7<br>105/127 | 77.9<br>166/213      | 0.82                |

\*AUC calculated by 10 fold cross validation of logistic regression model

**Table S2: Positive and negative predictive values for the two-threshold algorithm projected to different cohort AR prevalences, using molecular pathology as a comparator.**

| Cohort Prevalence (%) | PPV (%) | NPV (%) |
|-----------------------|---------|---------|
| 10.0                  | 32.6    | 97.7    |
| 15.0                  | 43.5    | 96.4    |
| 20.0                  | 52.2    | 95.0    |
| 25.0                  | 59.2    | 93.5    |
| 32.6*                 | 67.8    | 90.8    |

\*actual prevalence in study cohort

**Table S3: Published prospective studies assessing the performance of dd-cfDNA to detect rejection in renal allograft patients.**

| <b>Study</b>   | <b>dd-cfDNA measure</b> | <b>Biopsymatched samples in the analysis</b> | <b>Samples with biopsyproven AR in analysis</b> | <b>Sensitivity</b> | <b>Specificity</b> | <b>AUC</b> |
|----------------|-------------------------|----------------------------------------------|-------------------------------------------------|--------------------|--------------------|------------|
| Bloom 2017     | fraction                | 107                                          | 27                                              | 59%                | 85%                | 0.74       |
| Sigdel 2018    | fraction                | 217                                          | 35                                              | 89%                | 73%                | 0.87       |
| Huang 2019     | fraction                | 63                                           | 34                                              | 79%                | 72%                | 0.71       |
| Oellerich 2019 | quantity                | 143                                          | 22                                              | 73%                | 73%                | 0.83       |
| Gupta 2021*    | fraction                | 208                                          | 92                                              | 52%                | 92%                | 0.80       |
| Current study* | both                    | 367                                          | 125                                             | 82%                | 80%                | 0.86       |

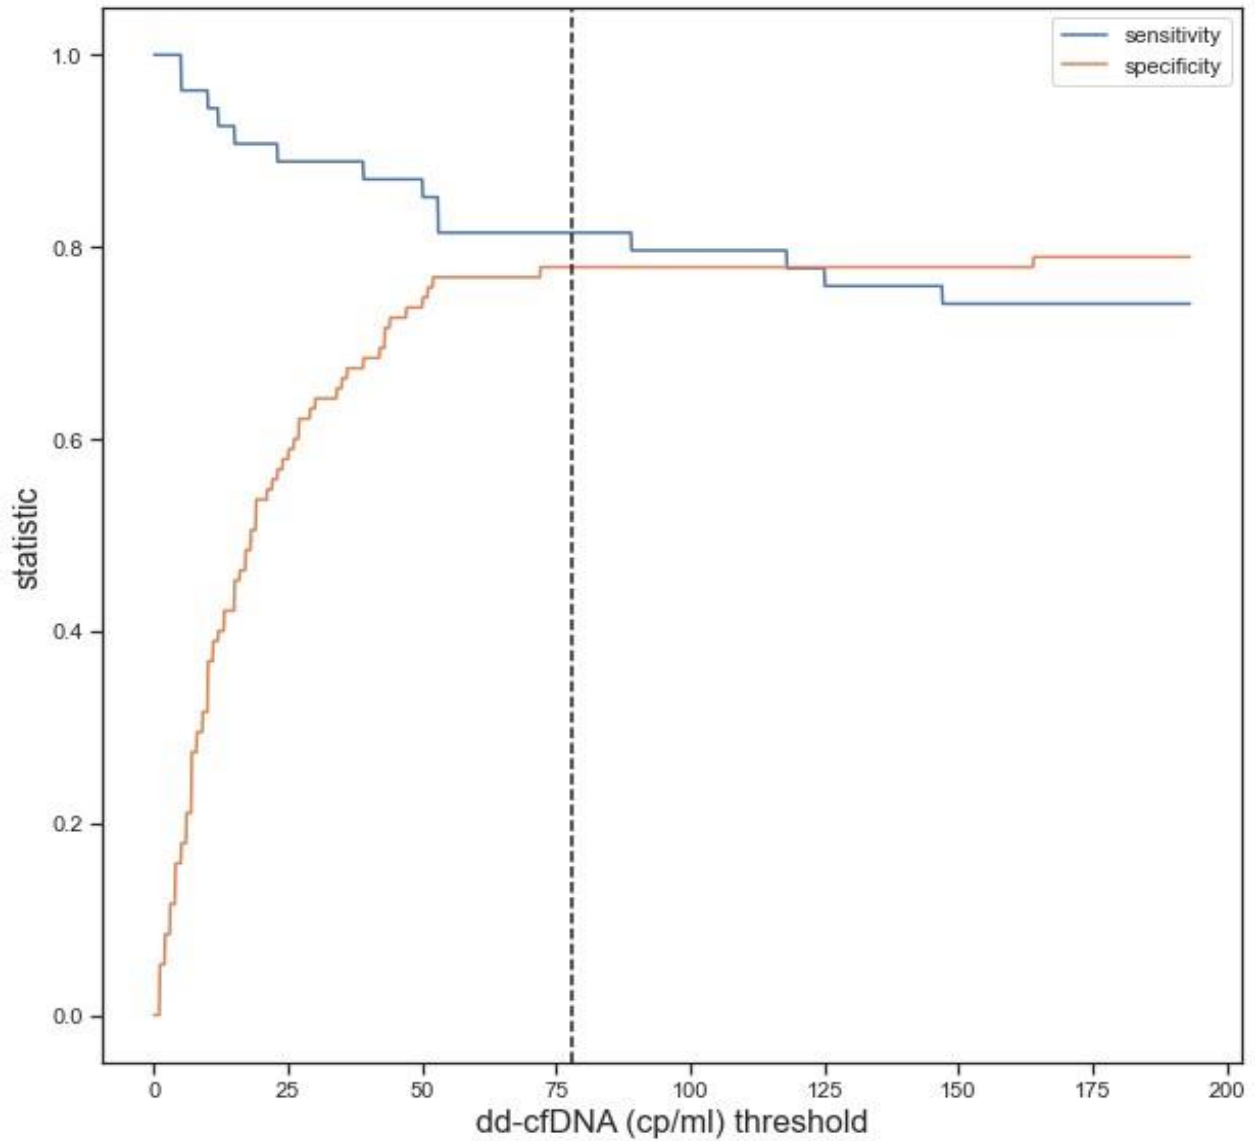

**Figure S1:** The numerical value for the dd-cfDNA quantity threshold was chosen by examination of the sensitivity (blue line) and specificity (red line) of the training set while keeping the dd-cfDNA fraction threshold constant at 1%. The vertical dashed line shows the final choice of the threshold value, 78 cp/mL.

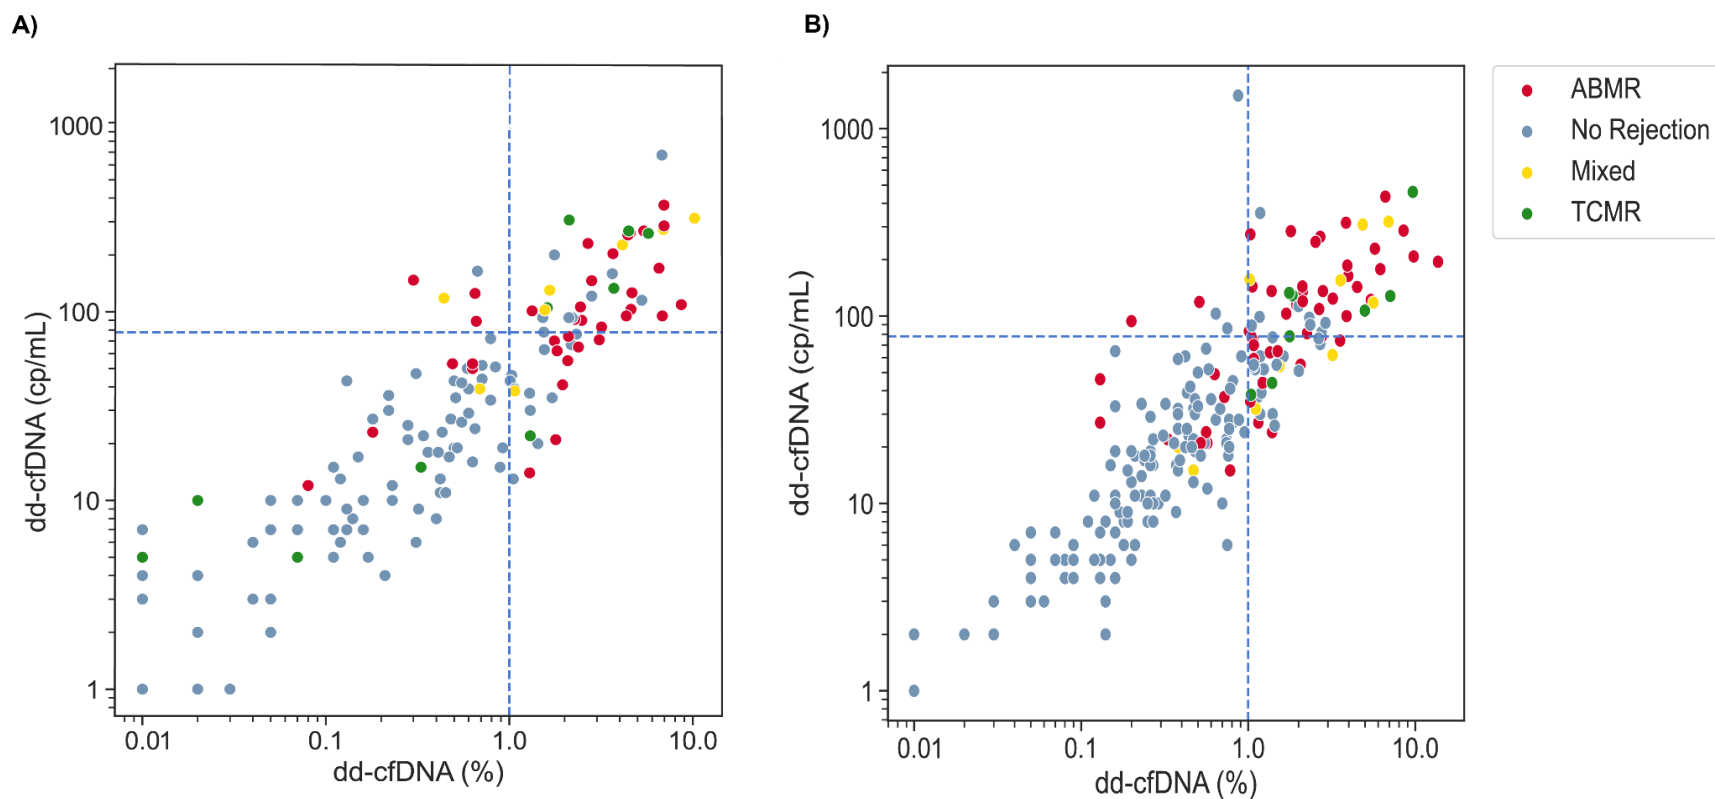

**Figure S2: Plot of dd-cfDNA fraction (%) and quantity (cp/mL) based on MMDx for the training set (A, N=149) and test set (B, N= 218).** The blue dashed horizontal and vertical lines indicate the dd-cfDNA quantity (78 cp/mL) and fraction (1%) thresholds, respectively. Patients with biopsy proven rejection: AMR, TCMR, Mixed, as adjudicated by MMDx, are depicted as red, green, and yellow dots, respectively. Patients with biopsies that show non-rejection are represented by gray dots. The two-threshold algorithm considers samples in the lower-left quadrant as low-risk for rejection, and samples in the remaining three quadrants, those with either dd-cfDNA quantity or fraction above the relevant thresholds, as high risk for rejection.

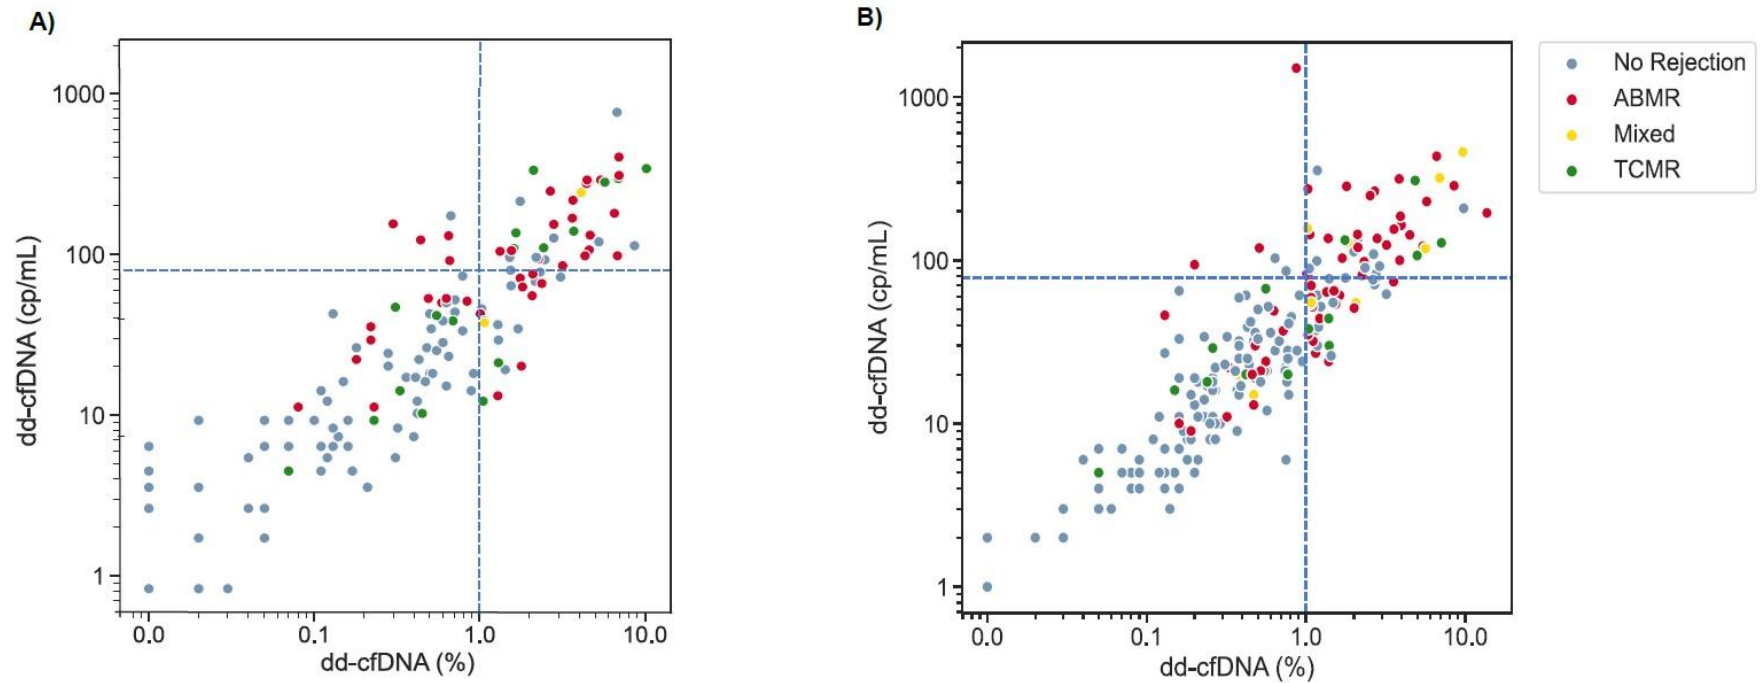

**Figure S3: Plot of dd-cfDNA fraction (%) and quantity (cp/mL) based on histology (Banff criteria) for the training set (A, N=146) and test set (B, N=213).** The blue dashed horizontal and vertical lines indicate the dd-cfDNA quantity (78 cp/mL) and fraction (1%) thresholds, respectively. Patients with biopsy proven rejection: AMR, TCMR, Mixed, as adjudicated by histology, are depicted as red, green, and yellow dots, respectively. Patients with biopsies that show non-rejection are represented by gray dots. The two-threshold algorithm considers samples in the lower-left quadrant as low-risk for rejection, and samples in the remaining three quadrants, those with either dd-cfDNA quantity or fraction above the relevant thresholds, as high risk for rejection.
